# Supplementary material for: Model-based analysis of an adaptive evolution experiment with Escherichia coli in a pyruvate limited continuous culture with glycerol
Source: Springer Nature journal article supplement (doi:10.1186/1687-4153-2012-14), 2012-10-03
Supplement: 13637_2012_19_MOESM4_ESM.pdf [file 13637_2012_19_MOESM4_ESM.pdf]

## 1. Wild Type

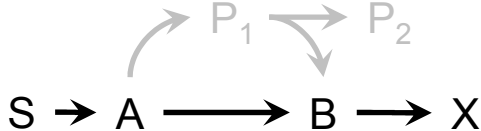

→ substrate S (glycerol)  
into biomass X via B (pyruvate)

## 2. Starting Mutant

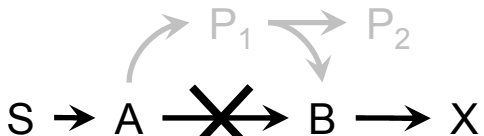

→ B auxotrophic

→ selection by limiting B supply

## 3. Evolved Mutant

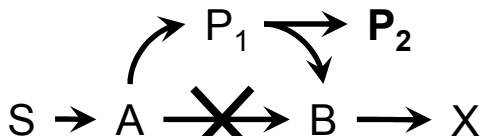

→ alternative synthesis of B

→ production of P<sub>2</sub> (or P<sub>4</sub>)
