# Supplementary material for: Model-based analysis of an adaptive evolution experiment with Escherichia coli in a pyruvate limited continuous culture with glycerol
Source: Springer Nature journal article supplement (doi:10.1186/1687-4153-2012-14), 2012-10-03

dihydroxyacetone path:

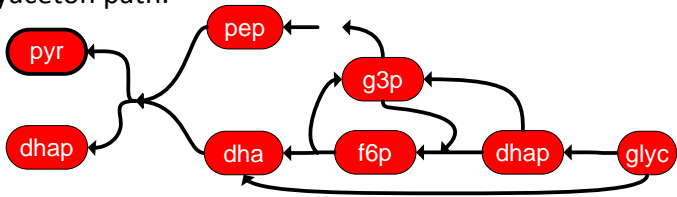

Entner-Doudoroff path:

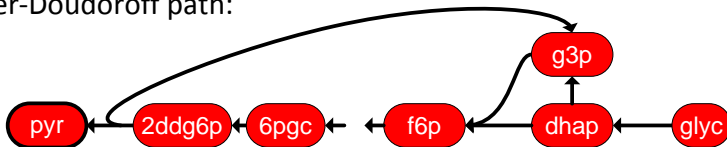

serine biosynthesis path:

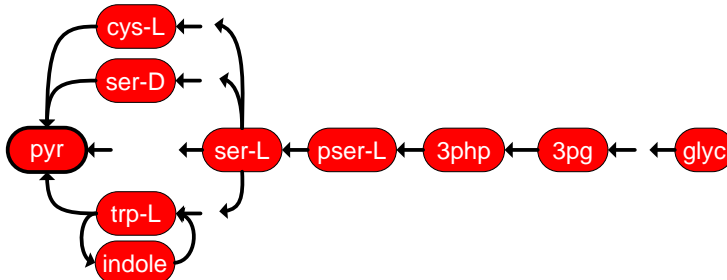

murein path:

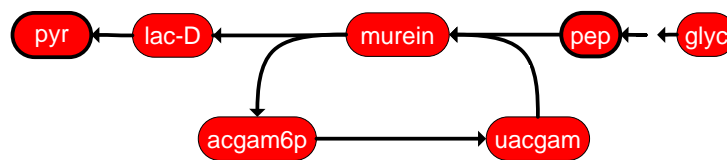

methylglyoxal path:

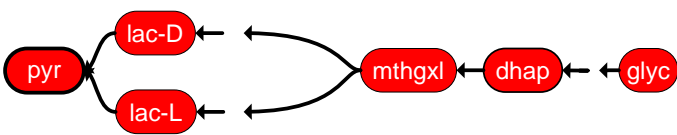

shikimate path:

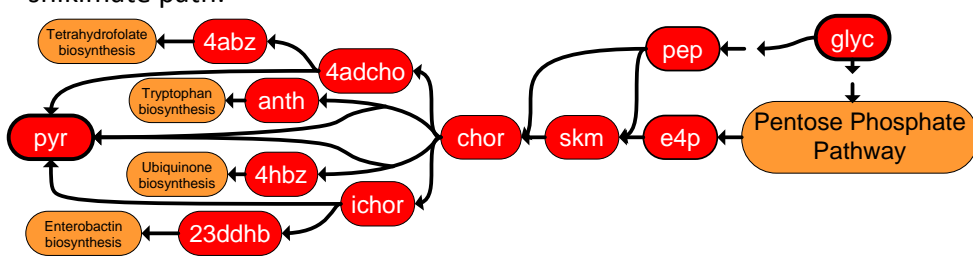

acCoA synthesis path:

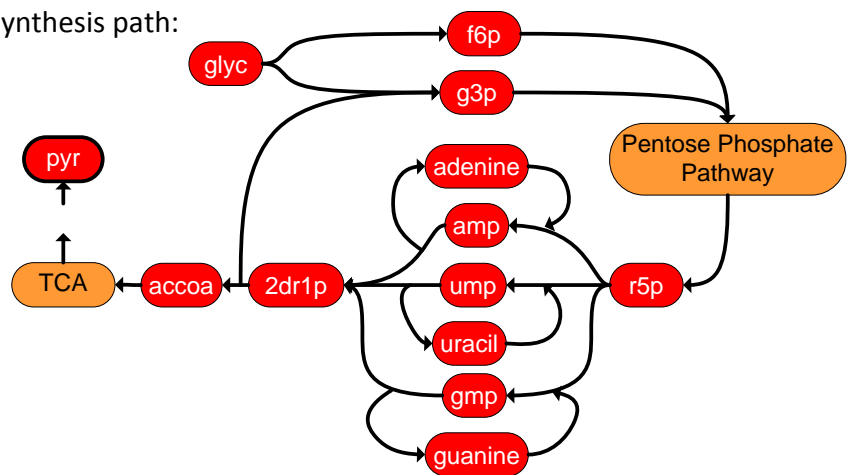

CO2 fixation path:

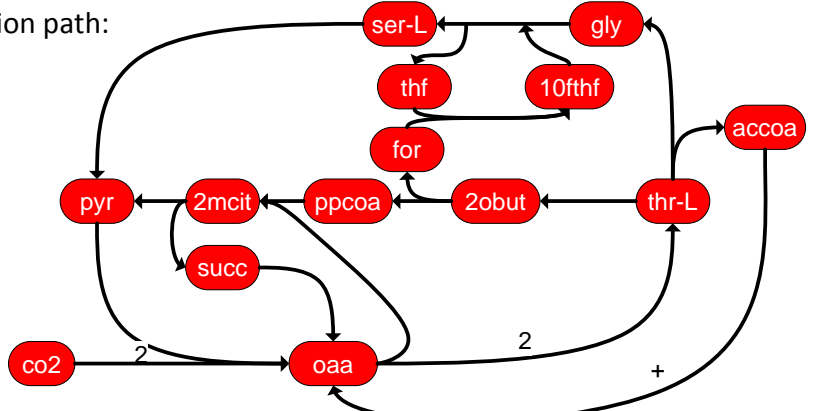

Supplement: 13637_2012_19_MOESM10_ESM.pdf [file 13637_2012_19_MOESM10_ESM.pdf]
