# Supplementary figures and images for: Model-based analysis of an adaptive evolution experiment with Escherichia coli in a pyruvate limited continuous culture with glycerol
Source: Springer Nature journal article supplement (doi:10.1186/1687-4153-2012-14), 2012-10-03

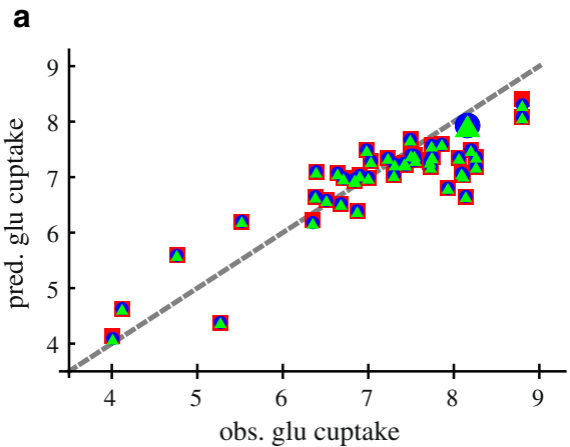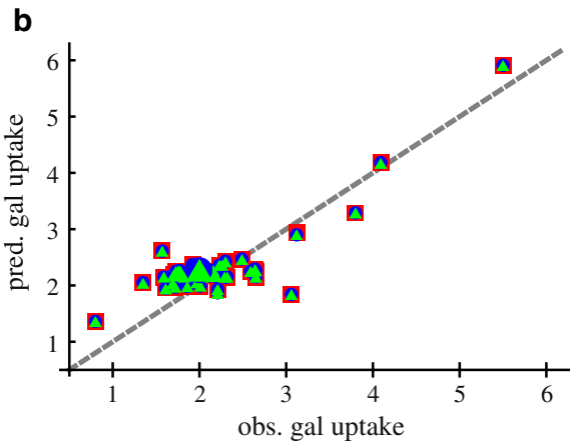

Supplement: 13637_2012_19_MOESM11_ESM.pdf [file 13637_2012_19_MOESM11_ESM.pdf]

Biosynthesis

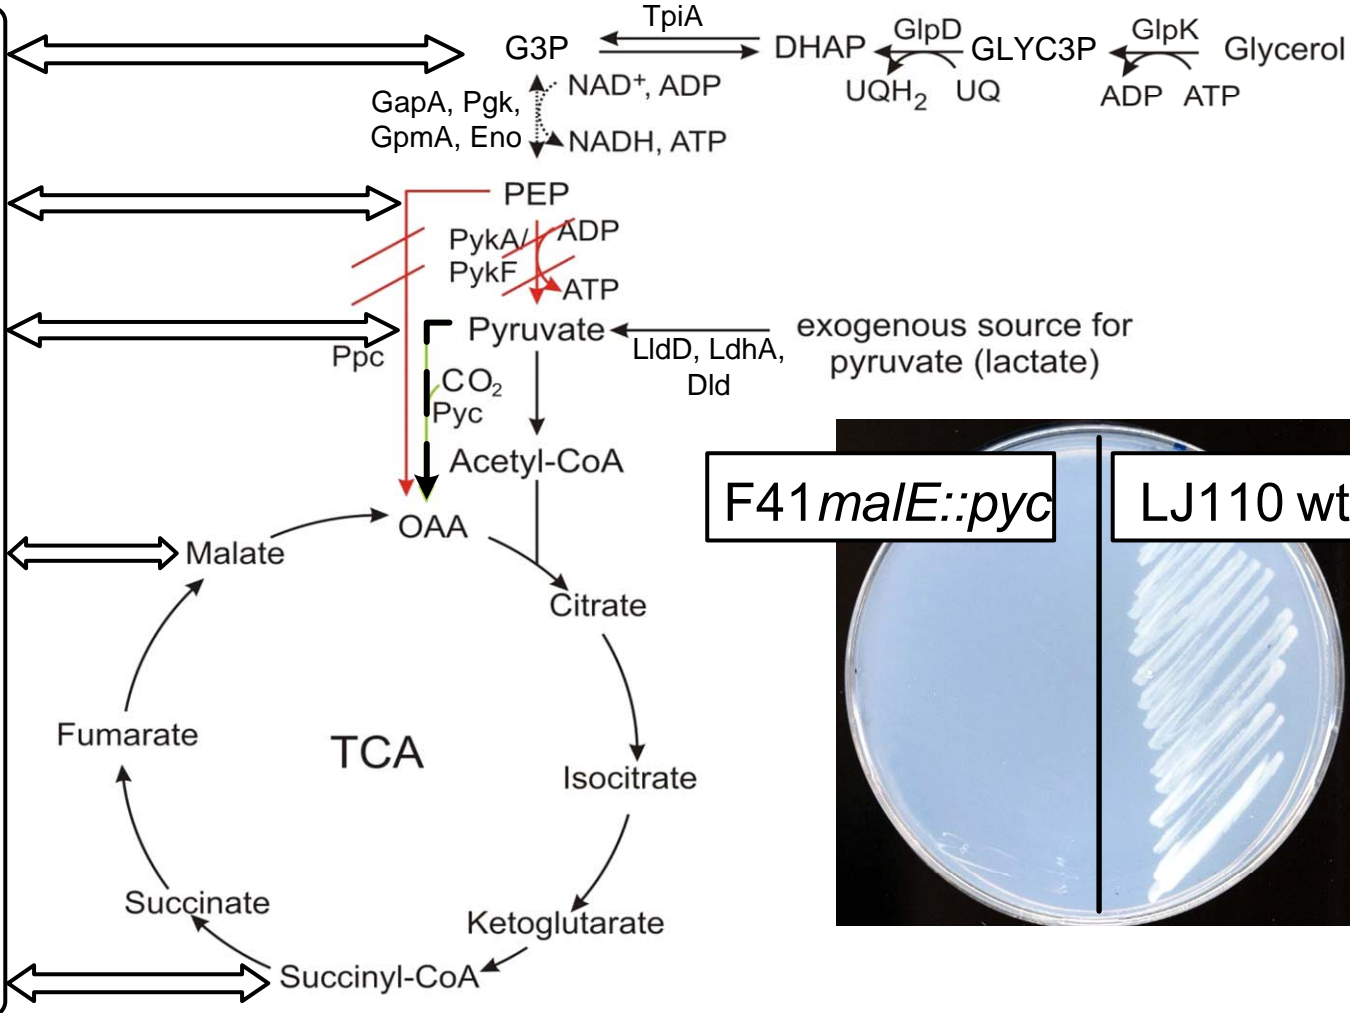

Supplement: 13637_2012_19_MOESM3_ESM.pdf [file 13637_2012_19_MOESM3_ESM.pdf]

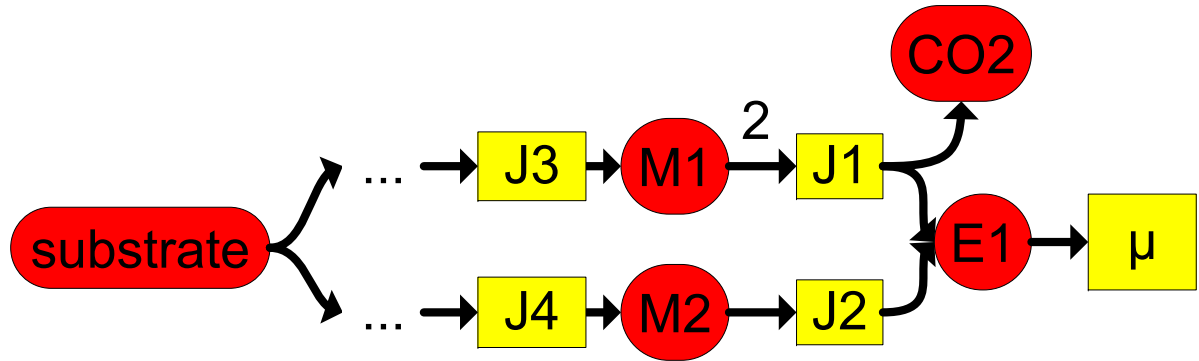

Supplement: 13637_2012_19_MOESM5_ESM.pdf [file 13637_2012_19_MOESM5_ESM.pdf]

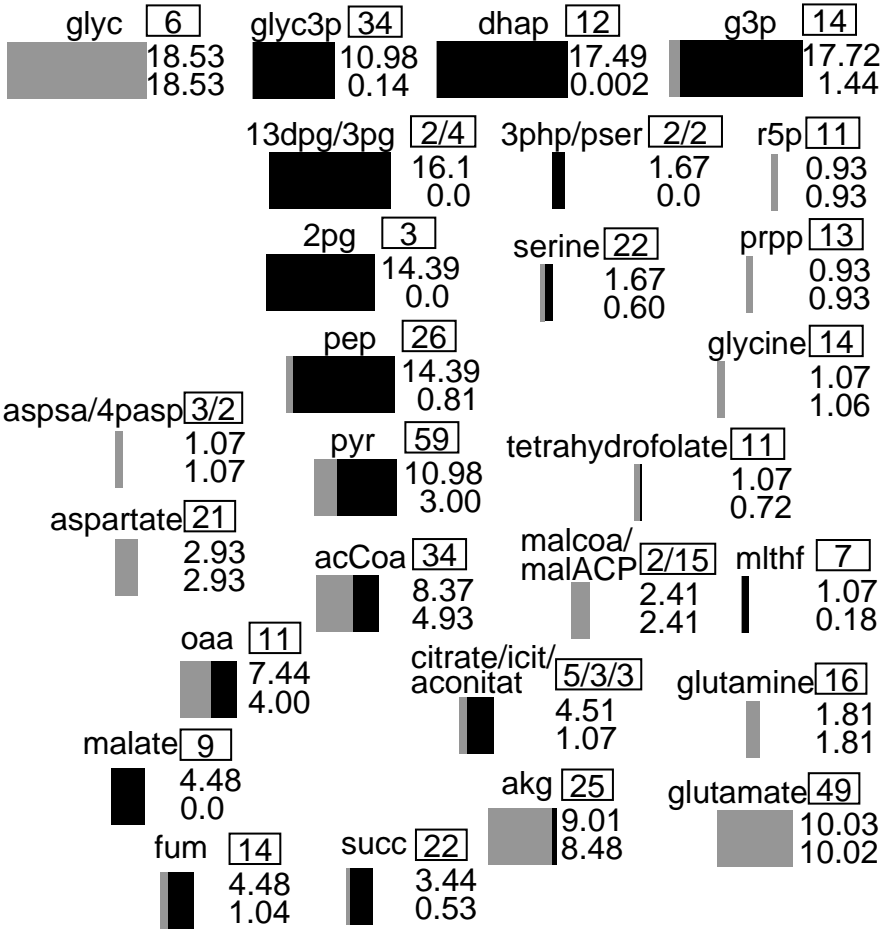

Supplement: 13637_2012_19_MOESM6_ESM.pdf [file 13637_2012_19_MOESM6_ESM.pdf]

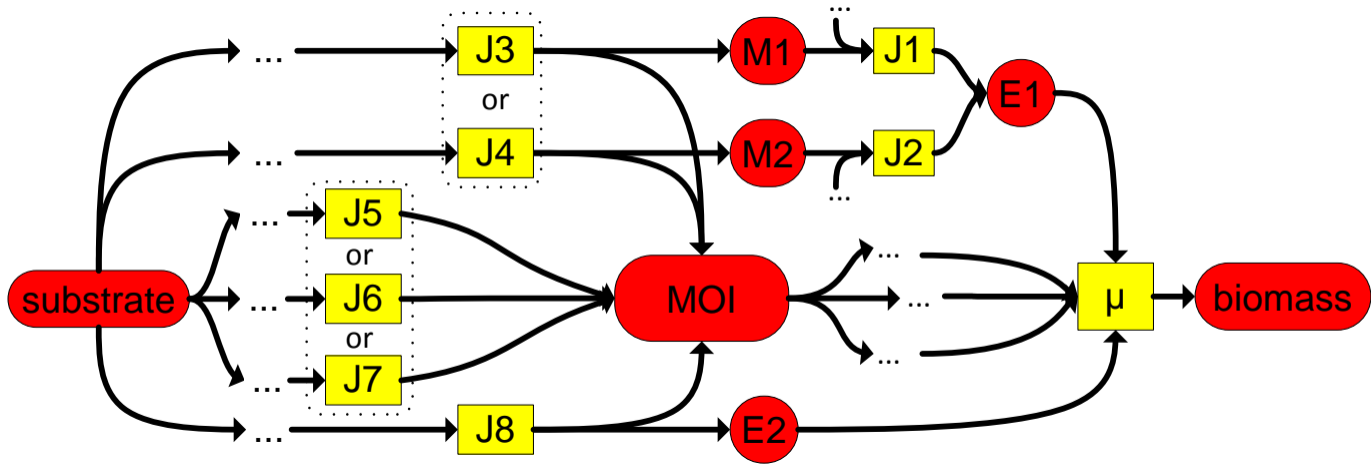

Supplement: 13637_2012_19_MOESM7_ESM.pdf [file 13637_2012_19_MOESM7_ESM.pdf]

biomass yield [gDCW mmol<sup>-1</sup>] on glycerol

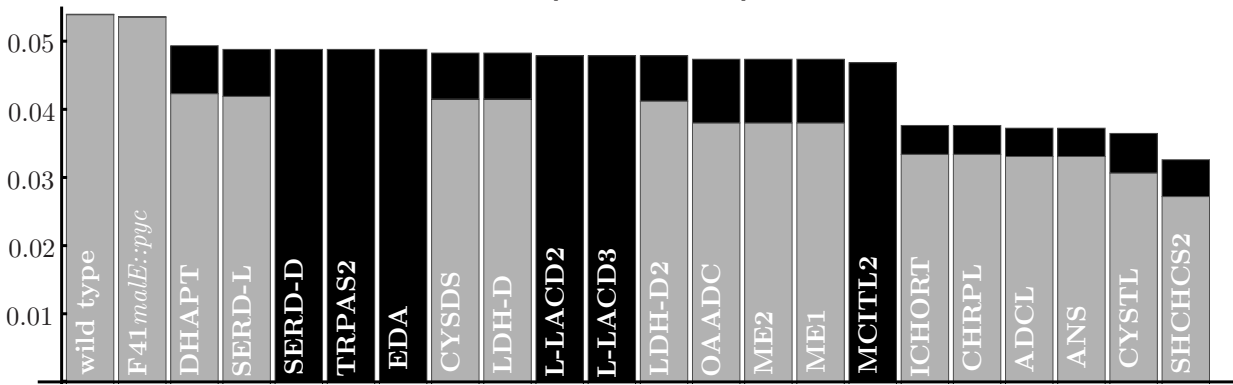

Supplement: 13637_2012_19_MOESM8_ESM.pdf [file 13637_2012_19_MOESM8_ESM.pdf]

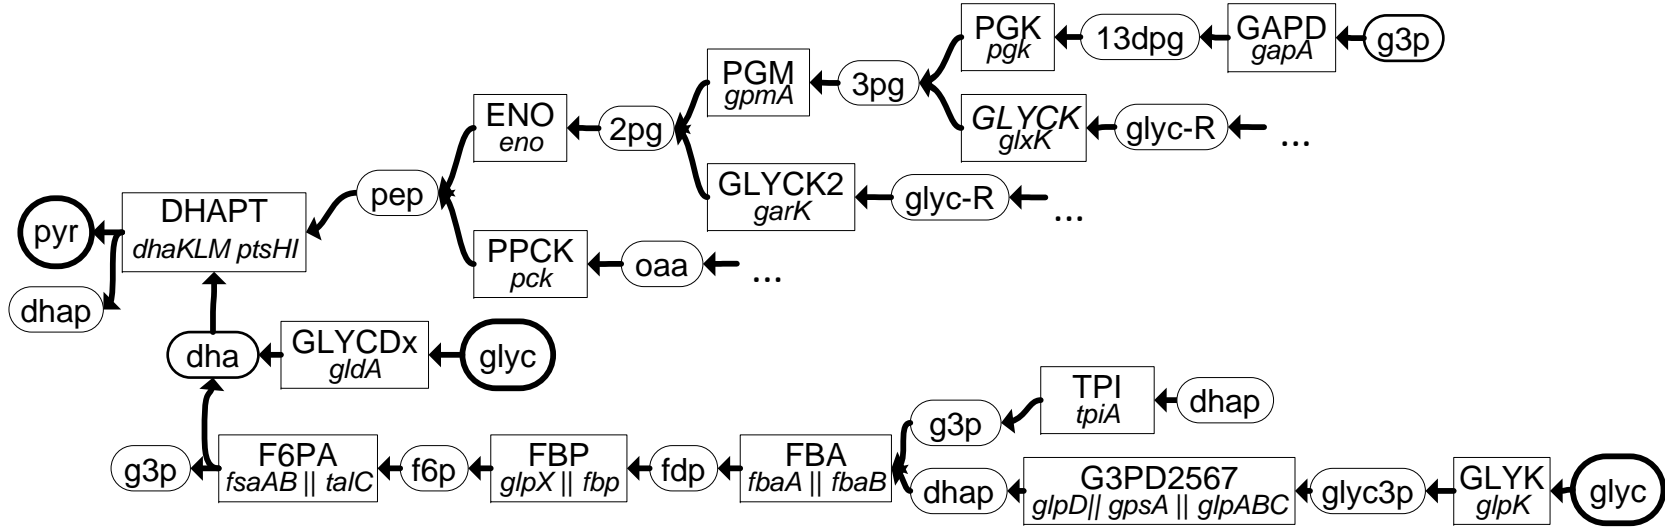

Supplement: 13637_2012_19_MOESM9_ESM.pdf [file 13637_2012_19_MOESM9_ESM.pdf]
